# Supplementary material for: Evaluation of Fresh Groundwater Lens Volume and Its Possible Use in Nauru Island
Source: MDPI journal article supplement (doi:10.3390/w14203201), 2022-10-11
Supplement: s1 [file s1]

Archive with 1 entries (1 files):
- water-1930462-supplementary.pdf
