# Supplementary material for: Evaluation of Fresh Groundwater Lens Volume and Its Possible Use in Nauru Island
Source: MDPI journal article supplement (doi:10.3390/w14203201), 2022-10-11
Supplement: s1 [file s1 › water-1930462-supplementary.pdf]

## Supplementary Materials

In this section, some more layouts of the numerical model parameters and results are shown.

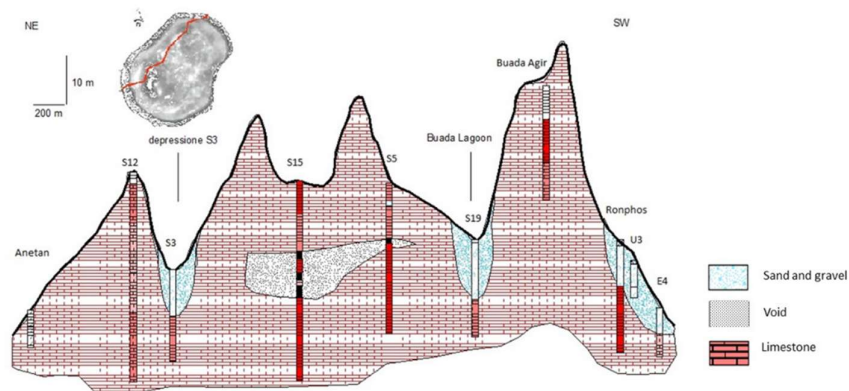

**Figure S1.** Hydrogeological section profile of Nauru island.

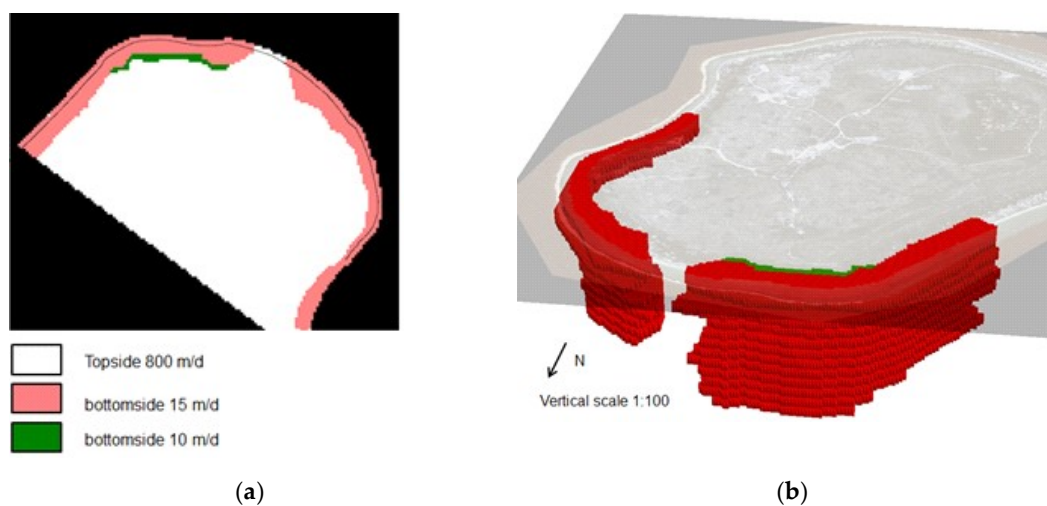

**Figure S2.** Plan and 3D representation of the hydraulic conductivity distribution in the numerical model; red and green color correspond to K values of sand deposits that, based on stratigraphy, was indicatively attributed from layer 1 to layer 12 in the West area and from layer 1 to layer 7 in the eastern part; the with color corresponds to K value of limestone that constitutes the entire Topside and the small outcrop along the Bottomside.

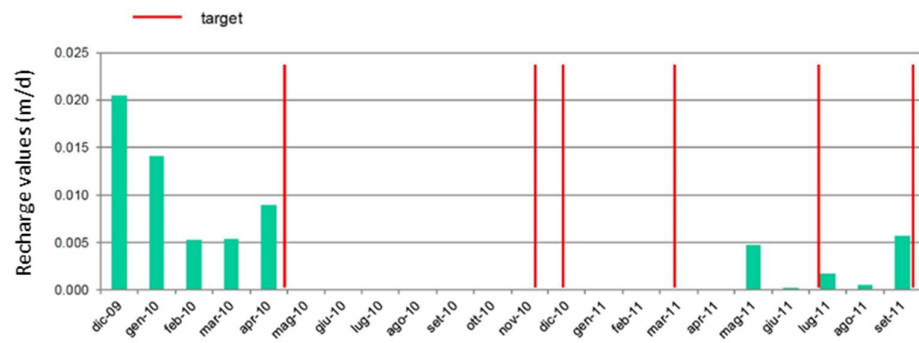

**Figure S3.** Recharge values (m/d) adopted in the model n.2 for each monthly Stress Period and the 6 monitoring campaigns (red lines).

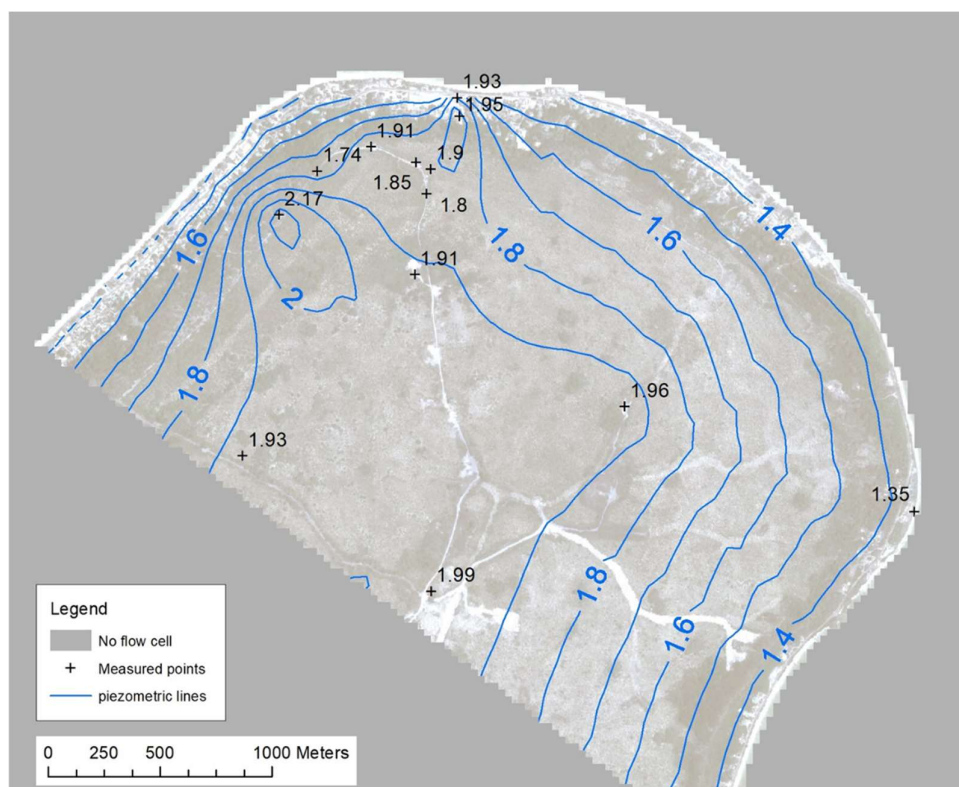

**Figure S4.** Measured hydraulic heads compared with simulated hydraulic heads after calibration process.

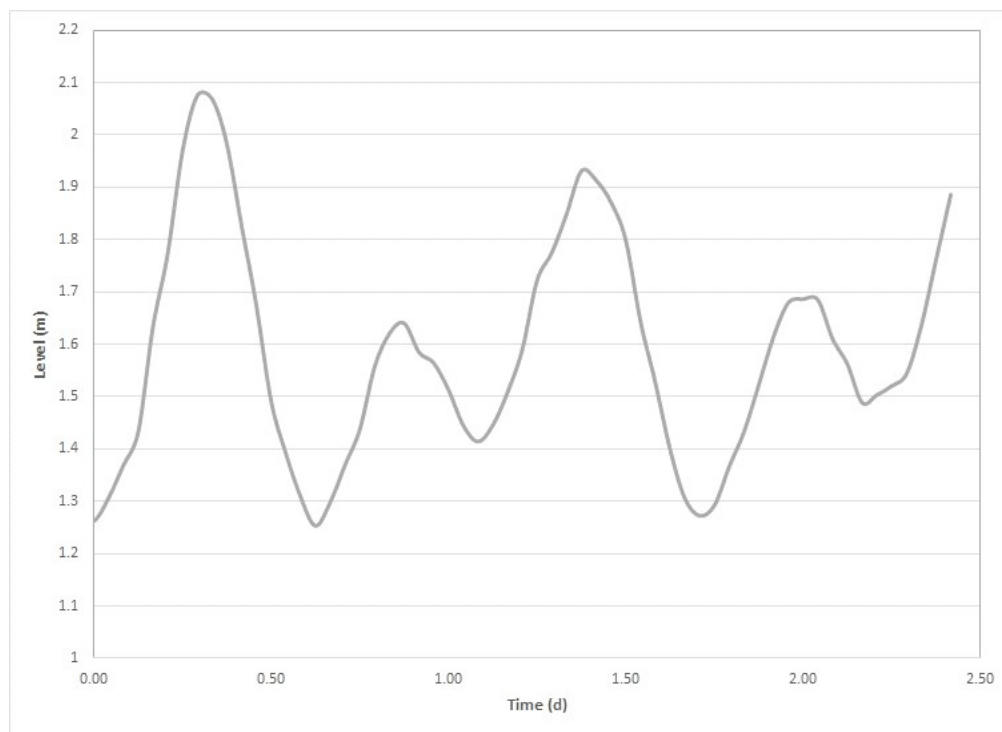

**Figure S5.** Sea levels (RL) attributed at the boundary condition for the model n.3 in order to reproduce the sea level variations.

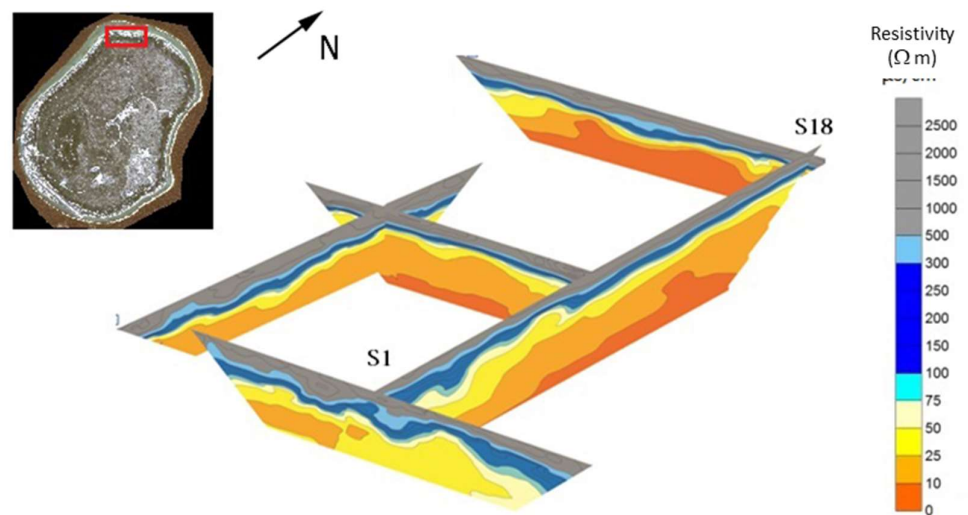

**Figure S6.** 3D representation of resistivity values detected through geoelectrical investigations at Capelle area .

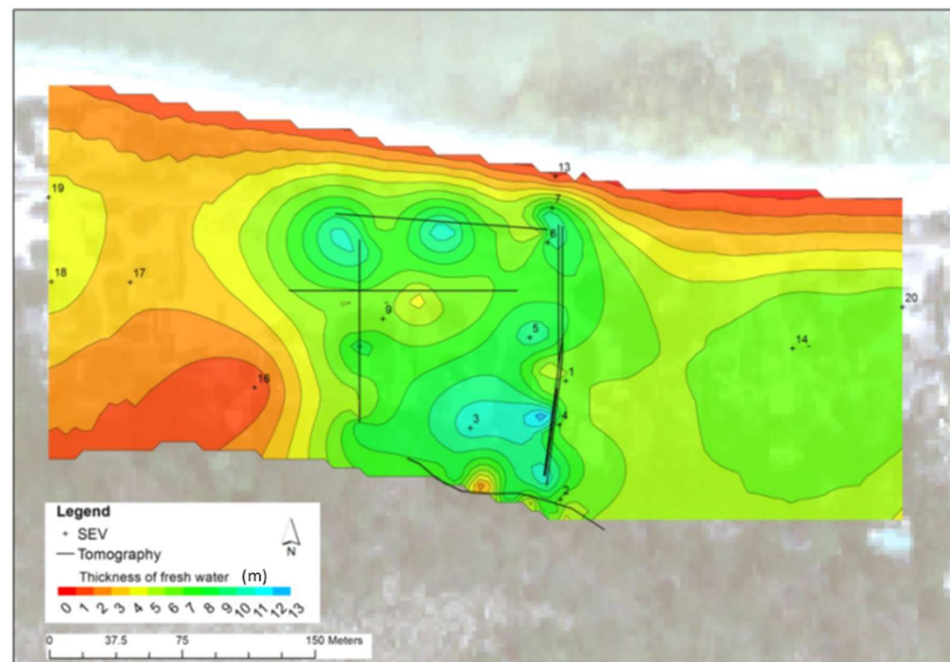

**Figure S7.** Freshwater thickness distribution in Capelle area considering 75  $\Omega\text{m}$  as separation limit between fresh and brackish water.

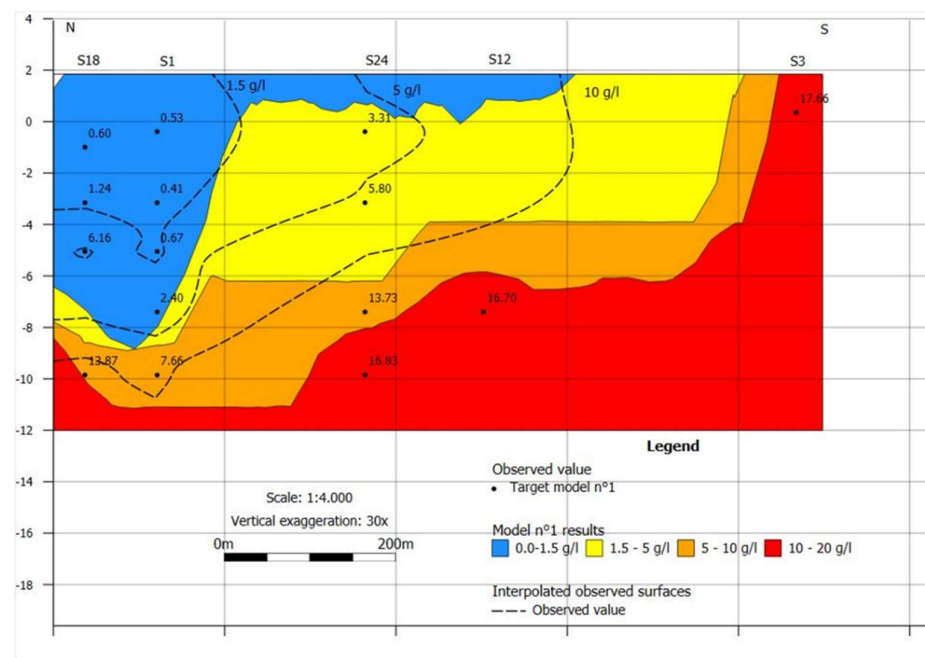

**Figure S8.** Observed concentration values compared with simulated ones.

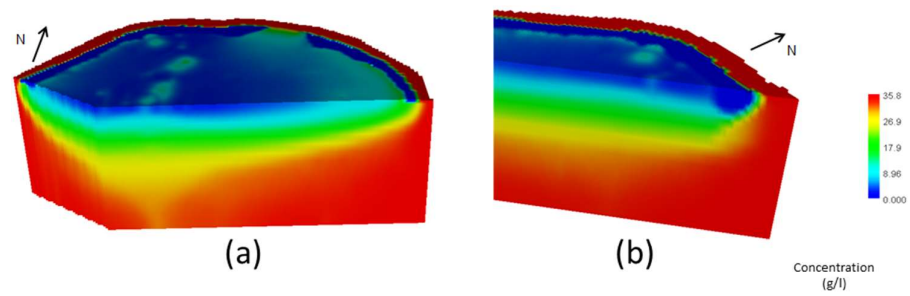

**Figure S9.** Model n.1, 3D representation of salt concentrations in groundwater in November 2009 (a) in the model domain and (b) along a cross section passing through Capelle area.

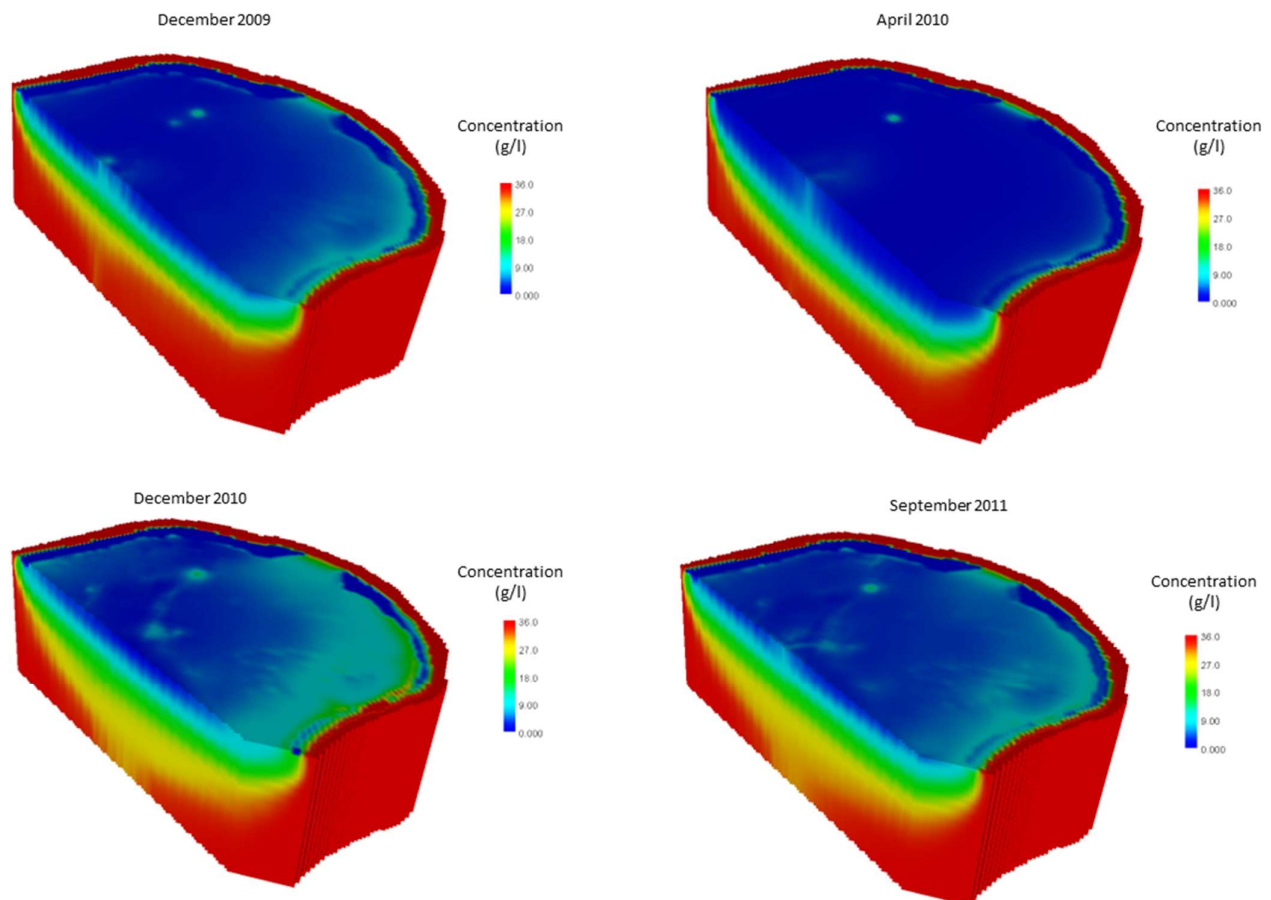

**Figure S10.** Model n.2, 3D concentration representation (g/L) for unsteady-state simulation run from December 2009 (SP1) to September 2011 (SP22).

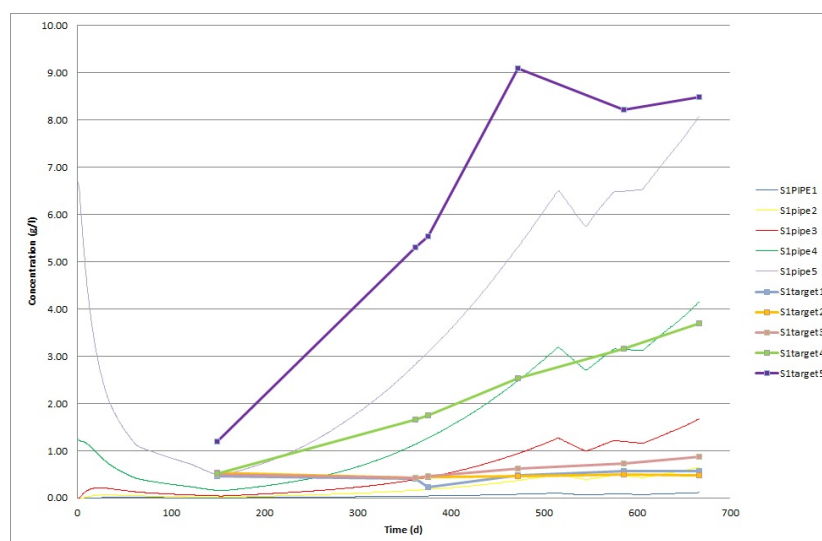

(a)

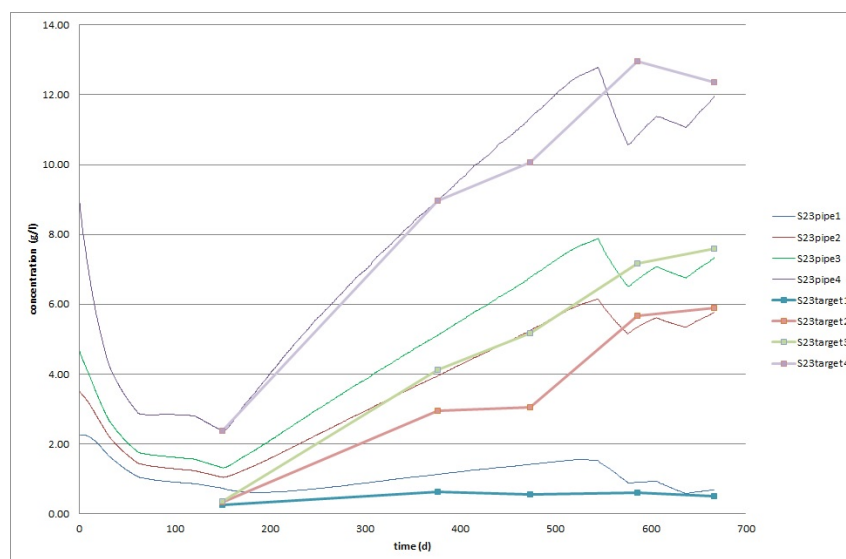

(b)

**Figure S11.** Model n.2, simulated versus observed concentrations from December 2009 to September 2011 in (a) S1 and (b) S23 monitoring wells /respectively Bottomside and Topside.

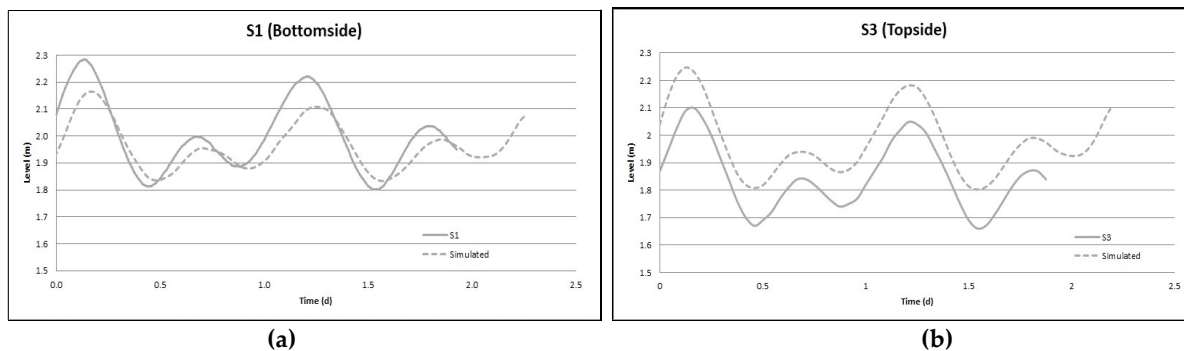

**Figure S12.** Observed and simulated groundwater levels (RL) resulting from the 2 days simulations in monitoring wells S1 (a) and S3 (b).

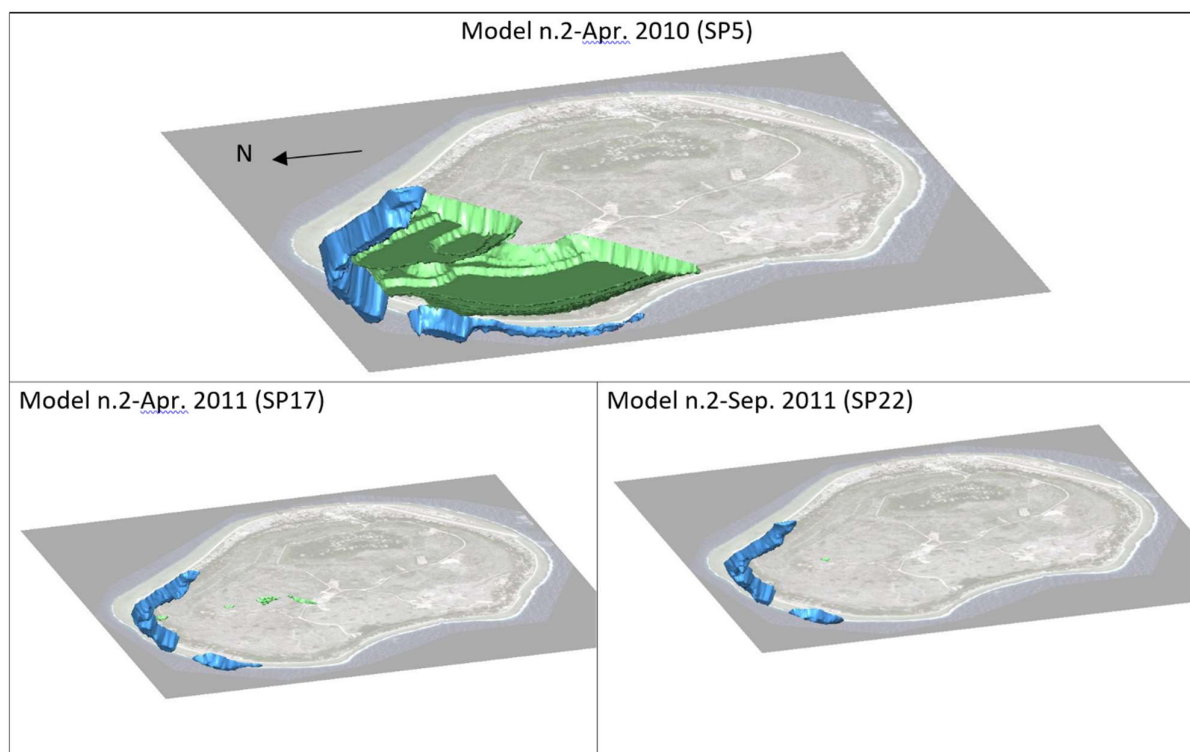

**Figure S13.** Representation through Leapfrog of the model n.2 unsteady state results, in blue the fresh groundwater body along the Bottomside and in green under the Topside; the view is from the bottom of the model and  $1.5 \text{ Kg/m}^3$  is the represented concentration surface that shows the shrinking of the fresh groundwater in 1.5 years
